# Supplementary material
Source: PubMed Central journal article supplement (PMC3533532)
Supplement: JCI60920sd.pdf [file JCI60920sd.pdf]

Fig. S1

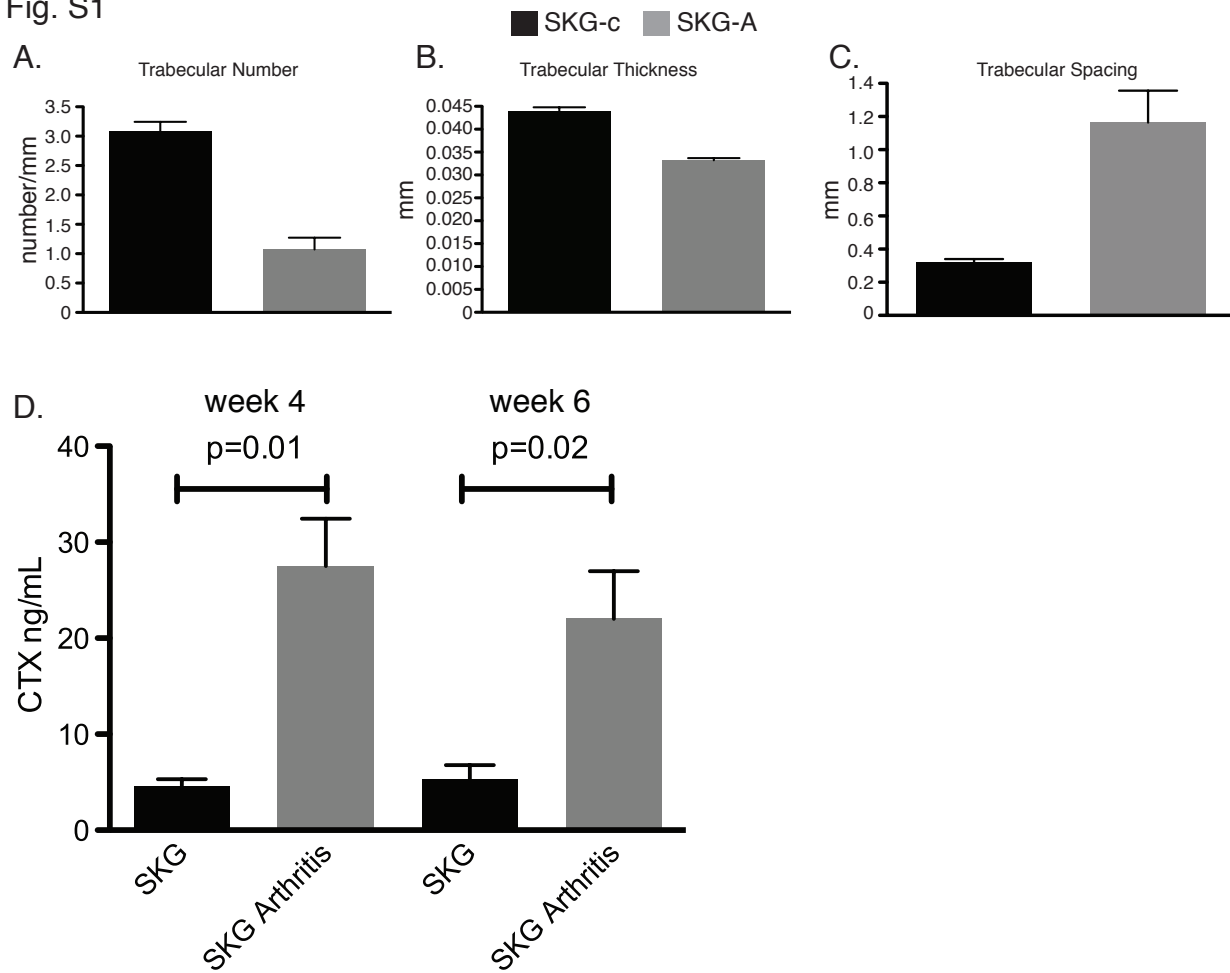

**Figure S1. MicroCT analysis of SKG mice shows significant changes in proximal tibia trabecular parameter consistent with osteopenia.** SKG mice at 14 weeks arthritis (SKG-A, gray bars), are compared to healthy litter mate controls (SKG-c, black bars). **(A)** Trabecular number and **(B)** trabecular thickness are significantly decreased, and **(C)** trabecular spacing is correspondingly increased in arthritic mice,  $p \leq 0.04$  for all comparisons, Student's t-test. Osteoclast resorptive activity measured by serum c-telopeptide (CTX) production is increased at 4 and 6 weeks after zymosan injection,  $n=5$  per group **(D)**.

Fig. S2

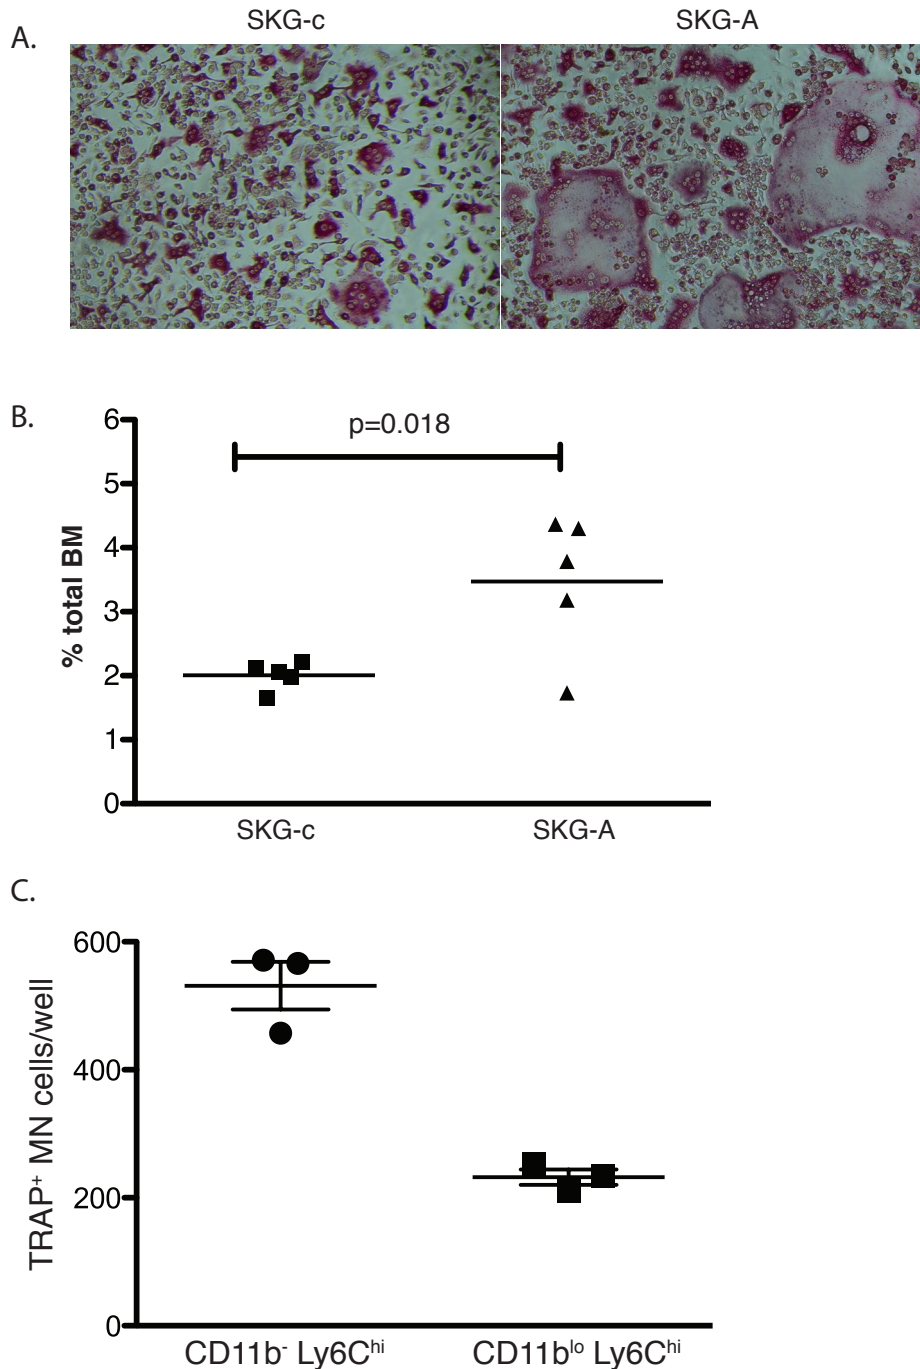

**Figure S2. A. Peripheral OC differentiation increases in SKG Arthritis.** Peripheral blood cells were collected from SKG mice 8 weeks after induction of arthritis (SKG-A) or from healthy SKG littermates (SKG-c), mononuclear cells were isolated by Ficoll gradient centrifugation and plated at  $1 \times 10^5$  cells/ well in 96 well plates in 5% CMG and 25ng/mL RANKL and cultured for 7 days. Results are representative of 2 independent experiments. **B. CD11b<sup>-</sup> Ly6C<sup>hi</sup> bone marrow OCP increase as early as 1 week after zymosan induction of arthritis.** CD11b and Ly6C staining of B220-CD3- Ter119- gated bone marrow from mice 1 week after zymosan injection (SKG-A) or control PBS injected mice (SKG-c) demonstrates increased OCP, n=5. Results are representative of 3 independent experiments. **C. OC precursor activity is found in both the CD11b<sup>-</sup> and CD11b<sup>lo</sup> Ly6C<sup>hi</sup> bone marrow cells.** The bone marrow CD45R<sup>-</sup> CD3<sup>-</sup> CD11b<sup>-</sup> Ly6C<sup>hi</sup> population was further subdivided into CD11b<sup>-</sup> and CD11b<sup>lo</sup> cells and purified by fluorescence activated cell sorting. Triplicate wells

Fig. S3

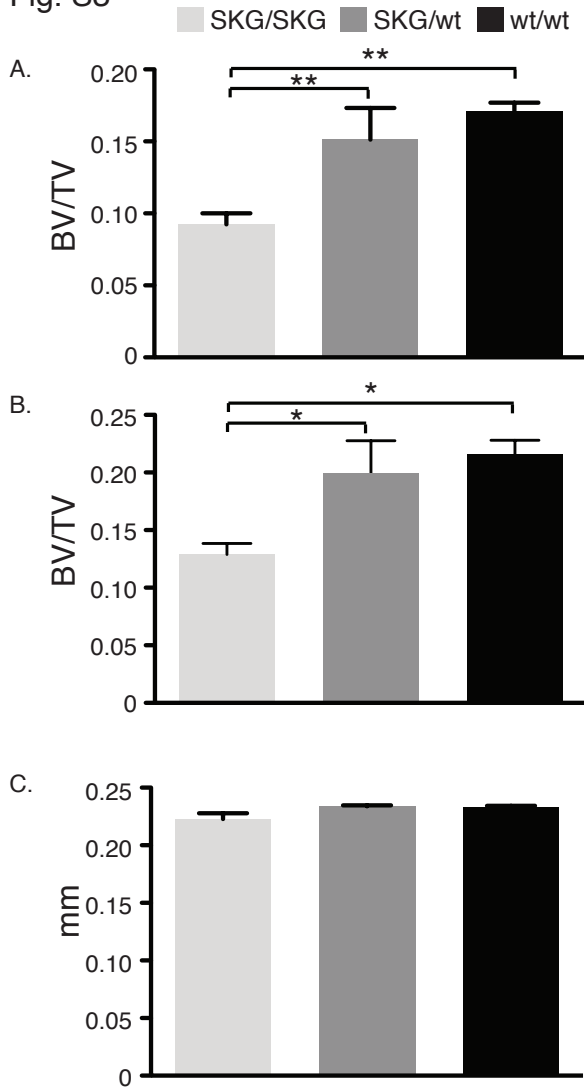

**Figure S3. Female SKG mice are osteopenic compared to heterozygous and wild-type littermates.** MicroCT analysis of 12-13 week old female mice from SKG<sup>het</sup> x SKG<sup>het</sup> parents shows trabecular osteopenia of SKG/SKG mice (light gray bars, n=6) compared to SKG<sup>het</sup> (dark gray bars, n=3) and wild-type mice (black bars, n=5) at both **(A)** proximal tibia and **(B)** distal femur, \*\*  $p \leq 0.005$ , \*  $p \leq 0.02$ , Student's t-test. **(C)** Cortical thickness, however, is not significantly changed at this age.

Fig. S4

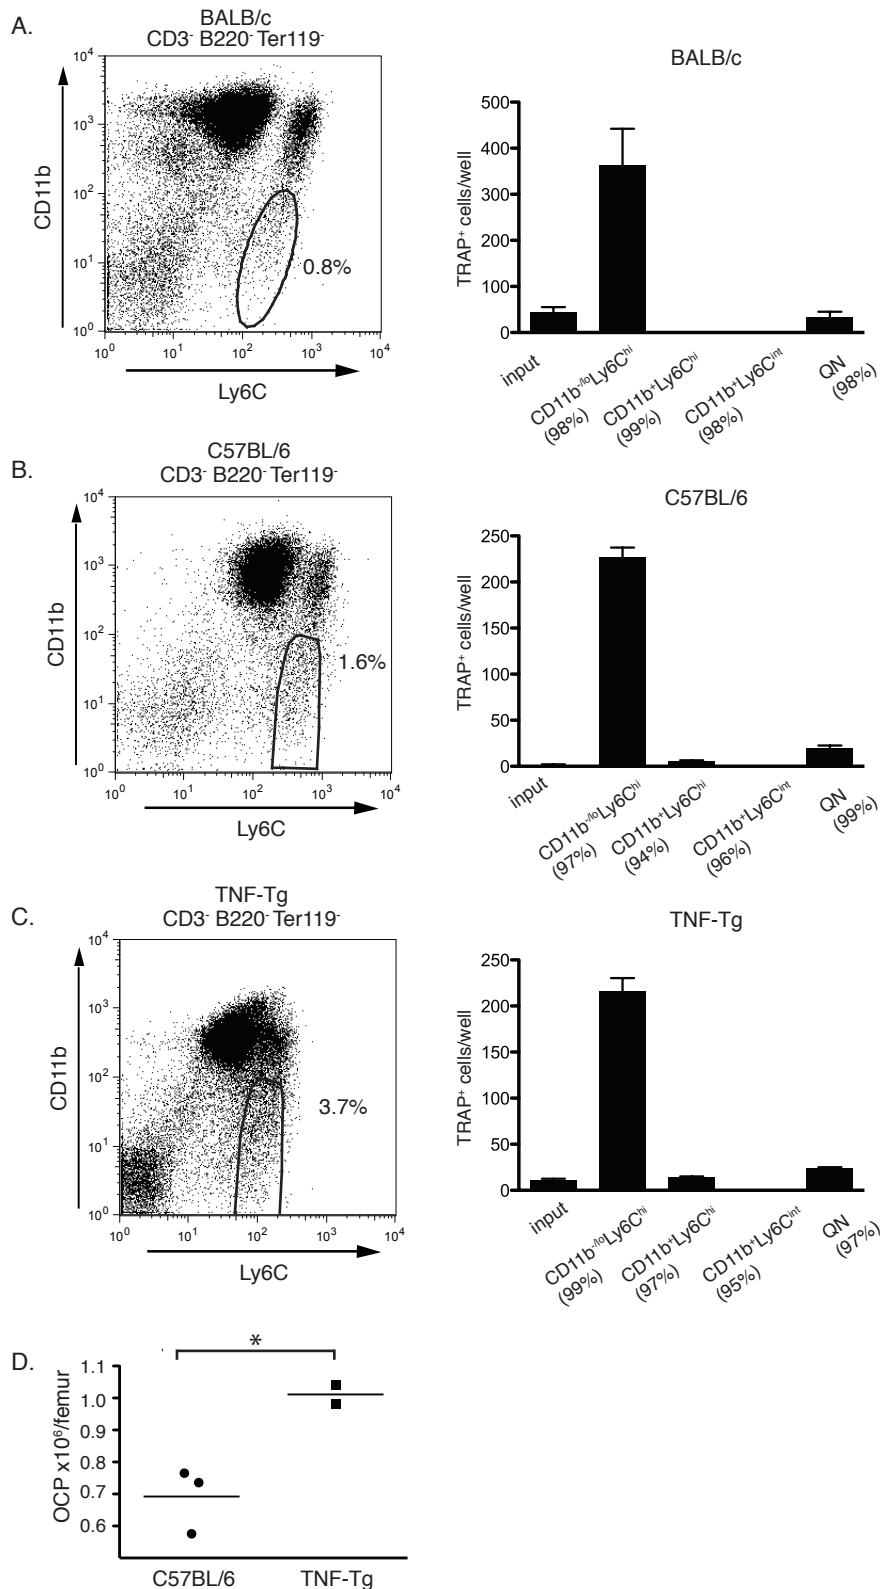

**Fig. S4. CD11b<sup>-/-</sup> Ly6C<sup>hi</sup> OCP are the primary osteoclast precursor population independent of strain.** Representative dot plots of CD11b and Ly6C stained CD3<sup>+</sup>B220<sup>+</sup>Ter119<sup>+</sup> bone marrow and multinucleated TRAP<sup>+</sup> cells cultured from individual bone marrow populations plated in triplicate for 3-4d in MCSF and 25ng/mL RANKL demonstrates that CD11b<sup>-/-</sup> Ly6C<sup>hi</sup> cells are also the primary osteoclast precursors in **(A)** BALB/c (12.5X10<sup>3</sup> cells/well) **(B)** C57BL/6 mice (2.5X10<sup>3</sup> cells/well) and **(C)** 20 week old TNF-Tg mice with arthritis (2.5X10<sup>3</sup> cells/well). The percent of OCP in total bone marrow is noted on the dot plot, and the purity of each sorted population is stated in parenthesis on the x-axis of the graph panel. Results are representative of 2 or more replicates. **(D)** The number of bone marrow OCP is significantly increased in arthritic TNF-Tg mice compared to age matched wild-type controls, \*p=0.03.

Fig. S5

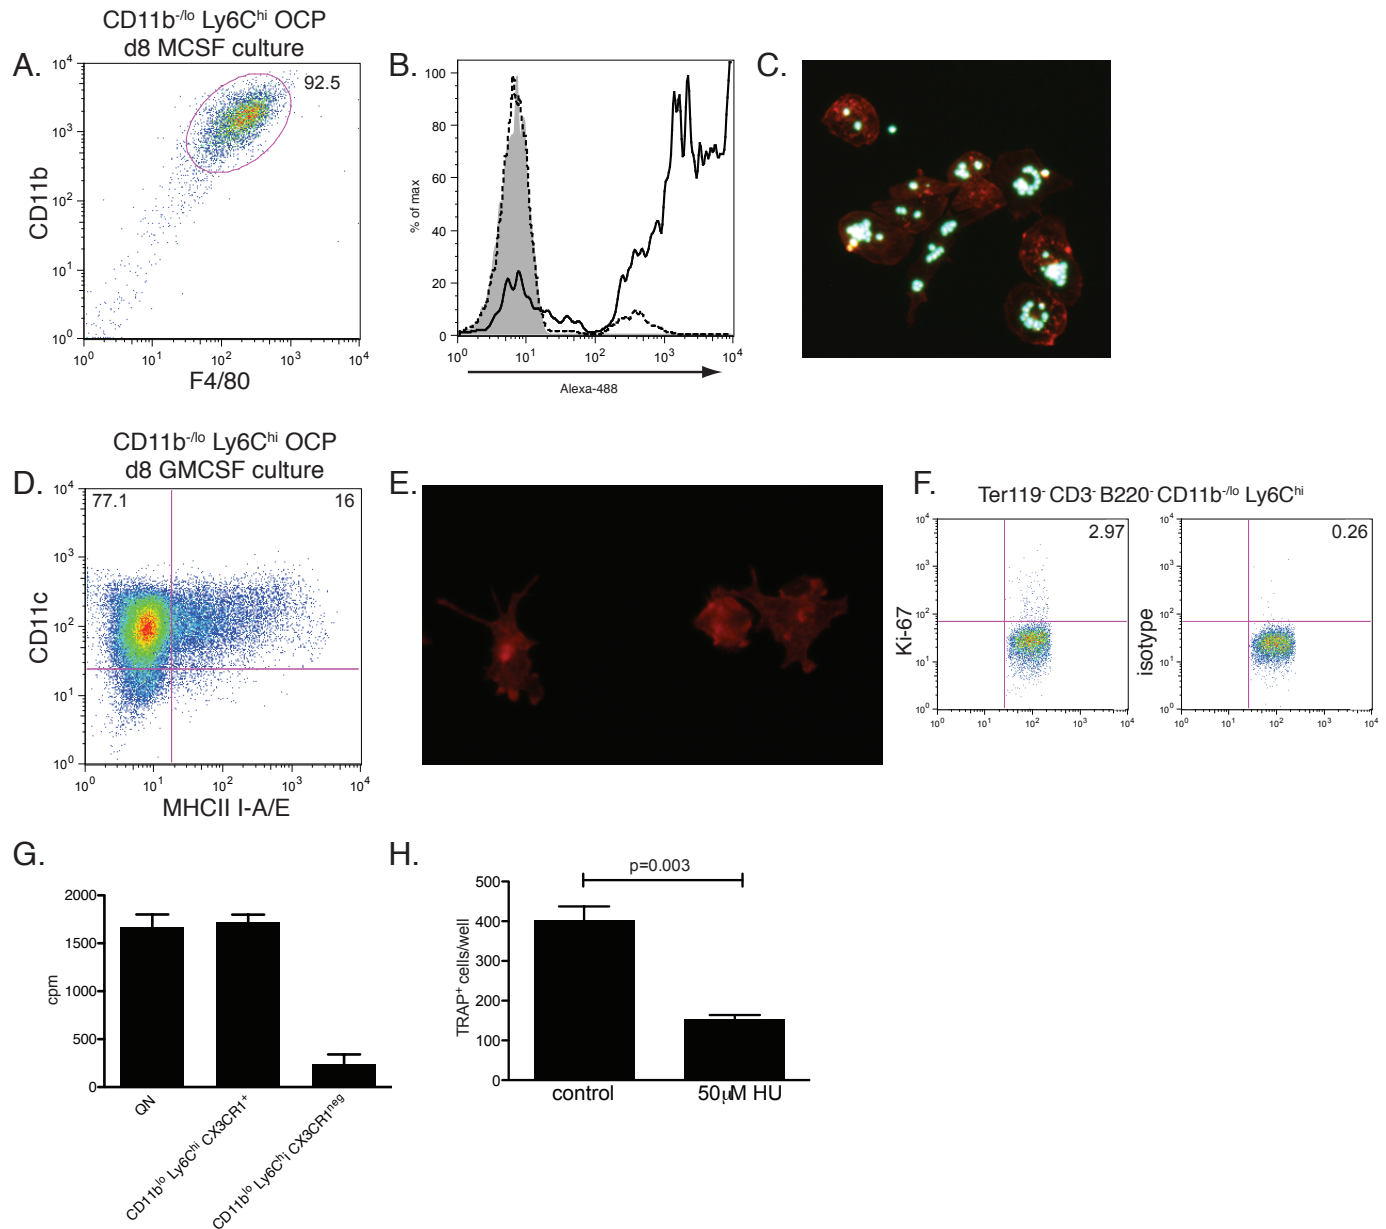

**Figure S5. CD11b<sup>-/-</sup> Ly6C<sup>hi</sup> CD117<sup>+</sup> OCP are multipotent *in vitro* and like circulating OCP are predominantly quiescent.** (A-C) In the presence of MCSF, sorted CD11b<sup>-/-</sup> Ly6C<sup>hi</sup> CD117<sup>+</sup> OCP differentiate into CD11b<sup>hi</sup> F4/80<sup>+</sup> macrophages with phagocytic activity. (A) After 8d culture in MCSF, OCP-derived cells are essentially all CD11b<sup>hi</sup> F4/80<sup>+</sup>. (B) OCP-derived macrophages phagocytose Alexa-488 labelled zymosan A and become Alex-488<sup>+</sup> (solid line) compared to untreated cells (solid gray); uptake is blocked by preincubation with cytochalasin D (dashed line). (C) OCP-derived macrophages from (B) stained with rhodamine-phalloidin demonstrating intracellular Alexa-488 zymosan A particles, 20X. (D-E) Sorted CD11b<sup>-/-</sup> Ly6C<sup>hi</sup> CD117<sup>+</sup> OCP differentiate into CD11c<sup>+</sup> dendritic cells in the presence of GMCSF. (D) OCP cultured in GMCSF for 8d and stimulated with LPS for 4h differentiate into CD11c<sup>+</sup> cells that express MHCII<sup>+</sup> in response to LPS. (E) Rhodamine-phalloidin staining of the cells in (D) demonstrates typical dendritic morphology, 20X. (F) Staining for Ki-67 demonstrates that the CD11b<sup>-/-</sup> Ly6C<sup>hi</sup> population is predominantly quiescent on isolation. (G) <sup>3</sup>H thymidine uptake shows that CD11b<sup>-/-</sup> Ly6C<sup>hi</sup> CX<sub>3</sub>CR1<sup>+</sup> OCP proliferate in response to MCSF in contrast to the CX<sub>3</sub>CR1<sup>-</sup> subpopulation. (H) Treatment with (HU) hydroxyurea greatly reduces TRAP<sup>+</sup> multinucleated OC differentiation from CD11b<sup>-/-</sup> Ly6C<sup>hi</sup> OCP, suggesting that proliferation is required for OC differentiation from bone marrow OCP.

Fig. S6

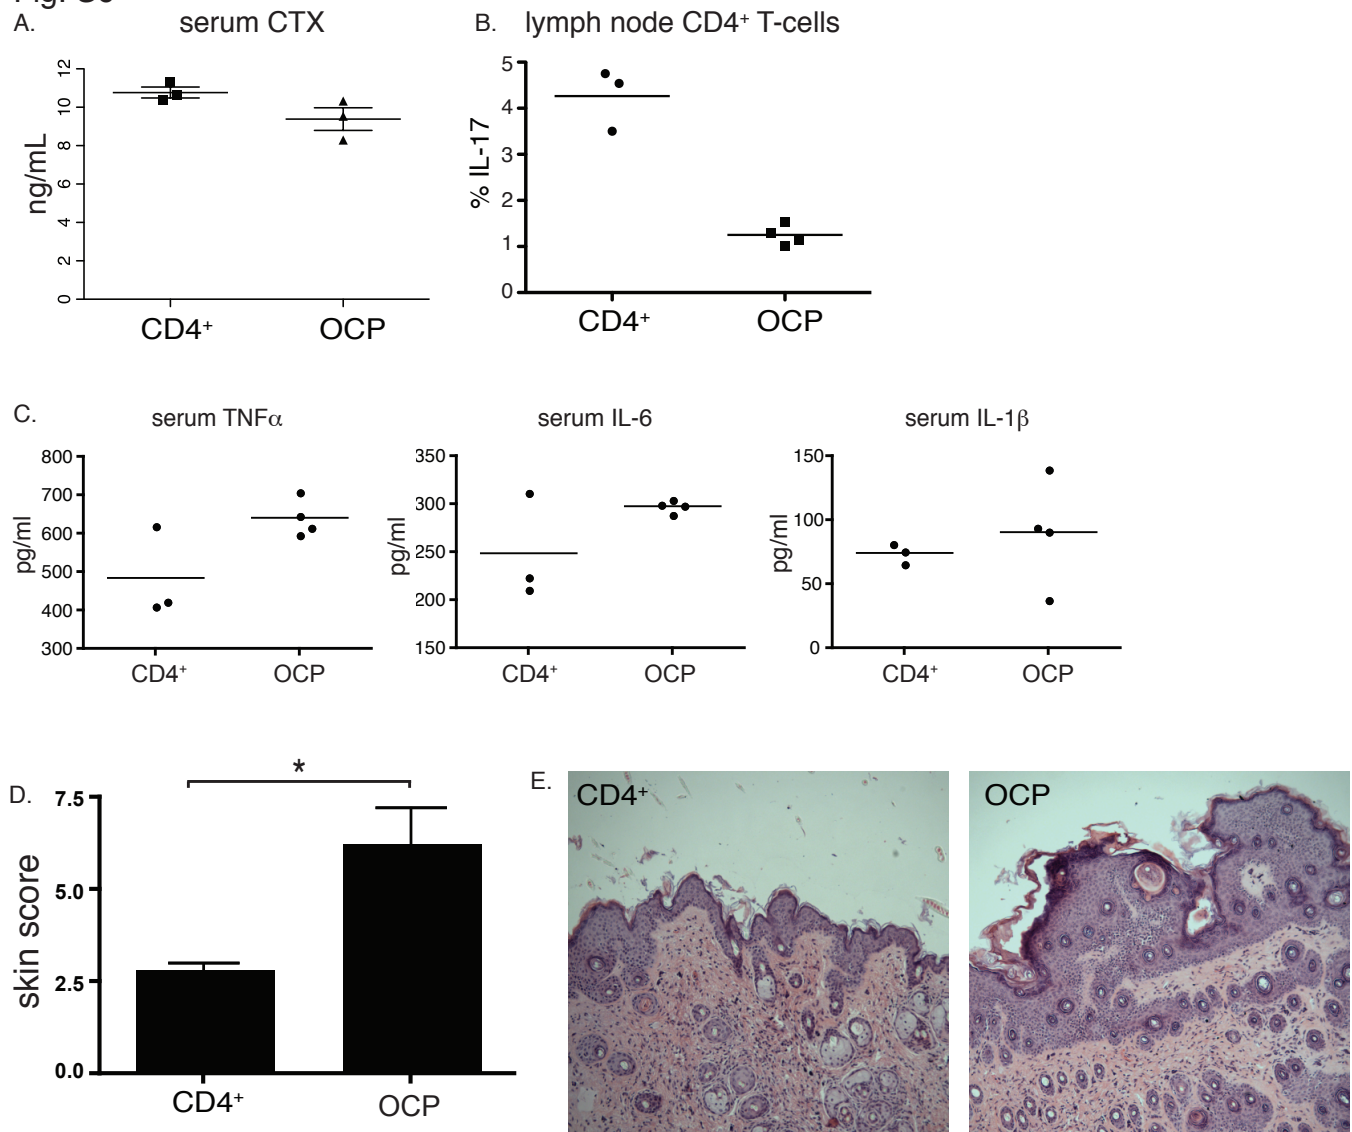

**Figure S6. Co-adoptive transfer of CD11b<sup>lo</sup> Ly6C<sup>hi</sup> OCP does not alter serum CTX, nor decrease inflammatory cytokines. (A) Serum CTX measured by ELISA. (B) Despite amelioration of inflammatory arthritis, serum levels of TNF $\alpha$ , IL-6 and IL-1 are not significantly reduced in mice receiving co-adoptive transfer of OCP. (C) IL-17 producing CD4<sup>+</sup> lymph node T-cells are decreased in the OCP group, but serum IL-17 levels are unchanged (data not shown), (D) Co-transfer of OCP significantly exacerbates inflammatory skin lesions compared to adoptive transfer of SKG CD4<sup>+</sup> T-cells alone, \*p= 0.03 Student's t-test. The T<sub>reg</sub> group had no skin abnormalities. (E) Representative images of skin pathology shows acanthosis, hyperkeratosis and dermal infiltrates that are more pronounced in the OCP group compared to the CD4<sup>+</sup> group. H&E stain, 4X.**

Fig. S7

A.

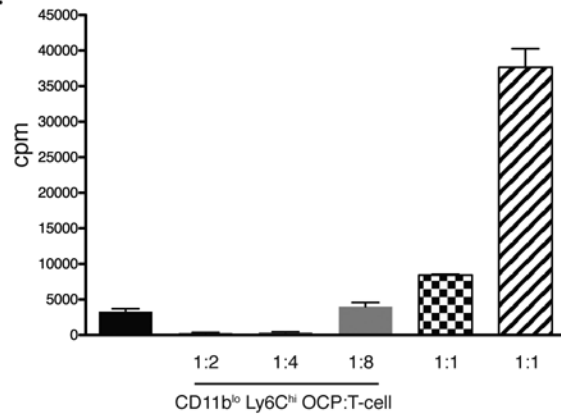

**Fig. S7. A. CD11b<sup>lo</sup> Ly6C<sup>hi</sup> OCP suppress *in vitro* CD8<sup>+</sup> T-cell proliferation.** CD11b<sup>lo</sup> Ly6C<sup>hi</sup> OCP purified from SKG bone marrow suppress CD8<sup>+</sup> T-cell proliferation (gray bars) in contrast to CD11b<sup>+</sup>Ly6C<sup>int</sup> (checked bars) or QN (striped bars) populations from the same bone marrow. Data is representative of 2 independent experiments.
